# Supplementary material
Source: MDPI journal article supplement (https://www.mdpi.com/2073-4441/16/9/1289)
Supplement: s1 [file s1]

# Optimized the Extraction of Sugars from Sewage Sludge using Ultrasound combined with Thermal-alkali

Yujie Fan <sup>1,\*</sup>, Qunshuai Li <sup>2</sup>, Frederico Gomes Fonseca <sup>3</sup>, Jianyang Song <sup>1</sup> and Miao Gong <sup>4</sup>

## Captions

Table S1 Crude sugar yield response surface design and results

Table S2 Results of ANOVA analysis of the regression model

**Table S1.** Crude sugar yield response surface design and results.

| Number | Amount of NaOH addition (mL) | Digestion time (min) | Ultrasound time (min) | Crude sugar yield (%) |
|--------|------------------------------|----------------------|-----------------------|-----------------------|
| 1      | 0                            | 0                    | 12.5                  | 1.12                  |
| 2      | 10                           | 37.5                 | 25                    | 33.22                 |
| 3      | 5                            | 0                    | 0                     | 0.86                  |
| 4      | 0                            | 37.5                 | 0                     | 1.93                  |
| 5      | 6                            | 60                   | 20                    | 34.22                 |
| 6      | 5                            | 37.5                 | 12.5                  | 31.90                 |
| 7      | 10                           | 75                   | 12.5                  | 31.07                 |
| 8      | 10                           | 37.5                 | 0                     | 27.23                 |
| 9      | 10                           | 0                    | 12.5                  | 15.60                 |
| 10     | 5                            | 75                   | 25                    | 18.80                 |
| 11     | 5                            | 75                   | 0                     | 27.13                 |
| 12     | 5                            | 0                    | 25                    | 16.10                 |
| 13     | 0                            | 75                   | 12.5                  | 3.21                  |
| 14     | 6                            | 60                   | 25                    | 18.80                 |
| 15     | 5                            | 37.5                 | 12.5                  | 31.97                 |
| 16     | 6                            | 60                   | 15                    | 33.04                 |
| 17     | 0                            | 37.5                 | 25                    | 2.85                  |

**Table S2.** Results of ANOVA analysis of the regression model. Parameters with p-value  $\leq 0.05$  are considered significant.

| Source         | Sum of Squares | df | Mean Square | F-value | p-value |             |
|----------------|----------------|----|-------------|---------|---------|-------------|
| Model          | 2616.63        | 9  | 290.74      | 21.05   | 0.0003  | significant |
| A              | 1196.93        | 1  | 1196.93     | 86.66   | <0.0001 |             |
| B              | 270.95         | 1  | 270.95      | 19.62   | 0.0030  |             |
| C              | 14.07          | 1  | 14.07       | 1.02    | 0.3464  |             |
| AB             | 42.91          | 1  | 42.91       | 3.11    | 0.1213  |             |
| AC             | 4.71           | 1  | 4.71        | 0.3407  | 0.5777  |             |
| BC             | 179.23         | 1  | 179.23      | 12.98   | 0.0087  |             |
| A <sup>2</sup> | 314.63         | 1  | 314.63      | 22.78   | 0.0020  |             |
| B <sup>2</sup> | 327.98         | 1  | 327.98      | 23.75   | 0.0018  |             |
| C <sup>2</sup> | 195.00         | 1  | 195.00      | 14.12   | 0.0071  |             |
| Residual       | 966.68         | 7  | 13.81       |         |         |             |
| Lack of Fit    | 96.68          | 6  | 16.11       | 6576.71 | 0.0094  | significant |
| Pure Error     | 0.0025         | 1  | 0.0025      |         |         |             |
| Cor. Total     | 2713.31        | 16 |             |         |         |             |
